# Supplementary material
Source: PubMed Central journal article supplement (PMC2705530)
Supplement: 0904184106_0904184106SI.pdf [file 0904184106_0904184106SI.pdf]

# Supporting Information

Sjöblom et al. 10.1073/pnas.0904184106

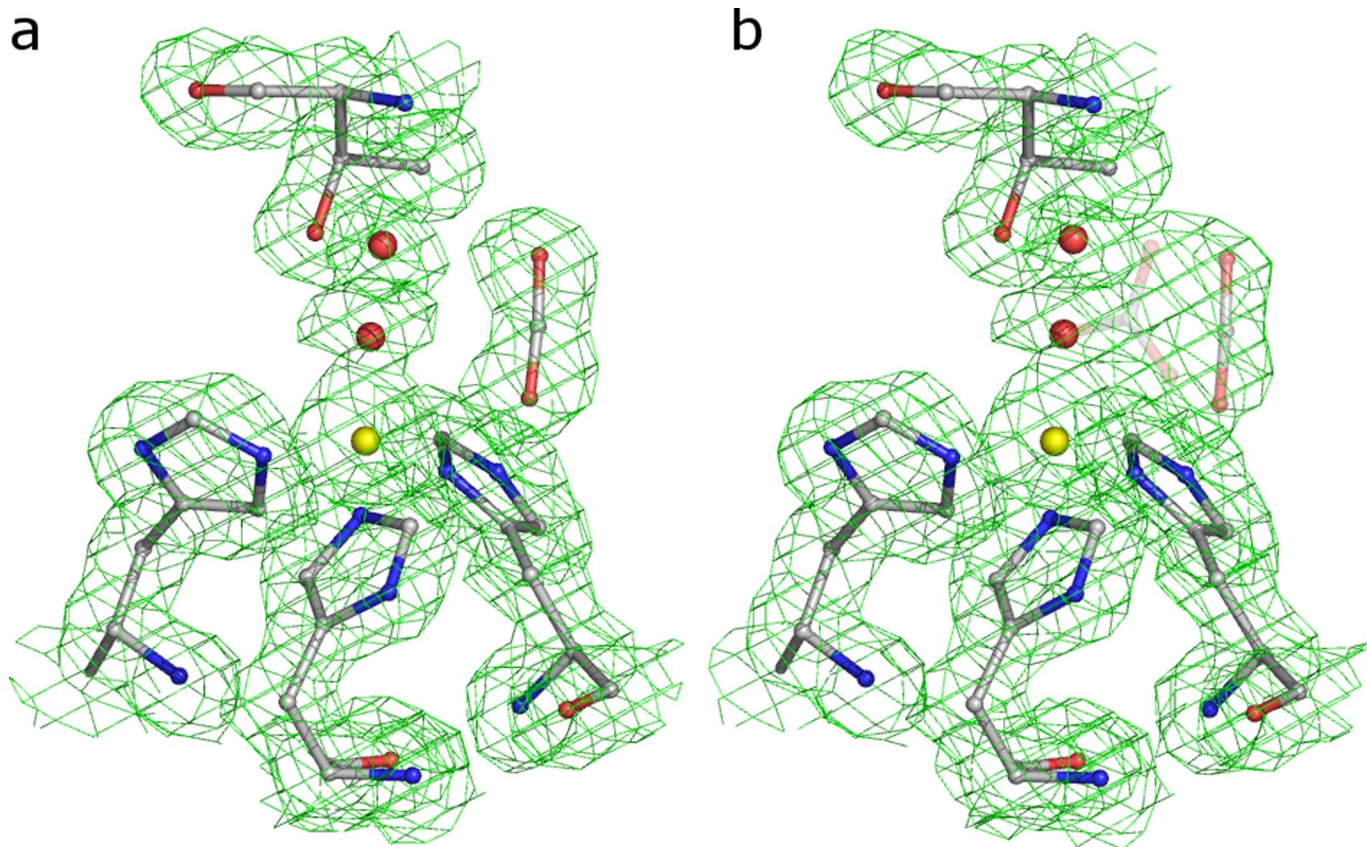

**Movie S1.** Substrate-to-product conversion in the active site of HCAII using diffraction data collected at 1.278-Å wavelength. Shown above are the first (a) and last (b) images of the movie. The movie presents 103 refined models together with the final  $2|F_o| - |F_c|$  map contoured at  $1\sigma$  level. The movie starts in a state corresponding to the HCAII:CO<sub>2</sub> complex, proceeds through decreasing substrate to product ratios, and ends in a state with 65% CO<sub>2</sub> and 35% HCO<sub>3</sub><sup>-</sup> at delivered dose corresponding to 30% Henderson limit. The occupancy of carbon dioxide and bicarbonate is represented by the transparency of the models.

[Movie S1 \(GIF\)](#)

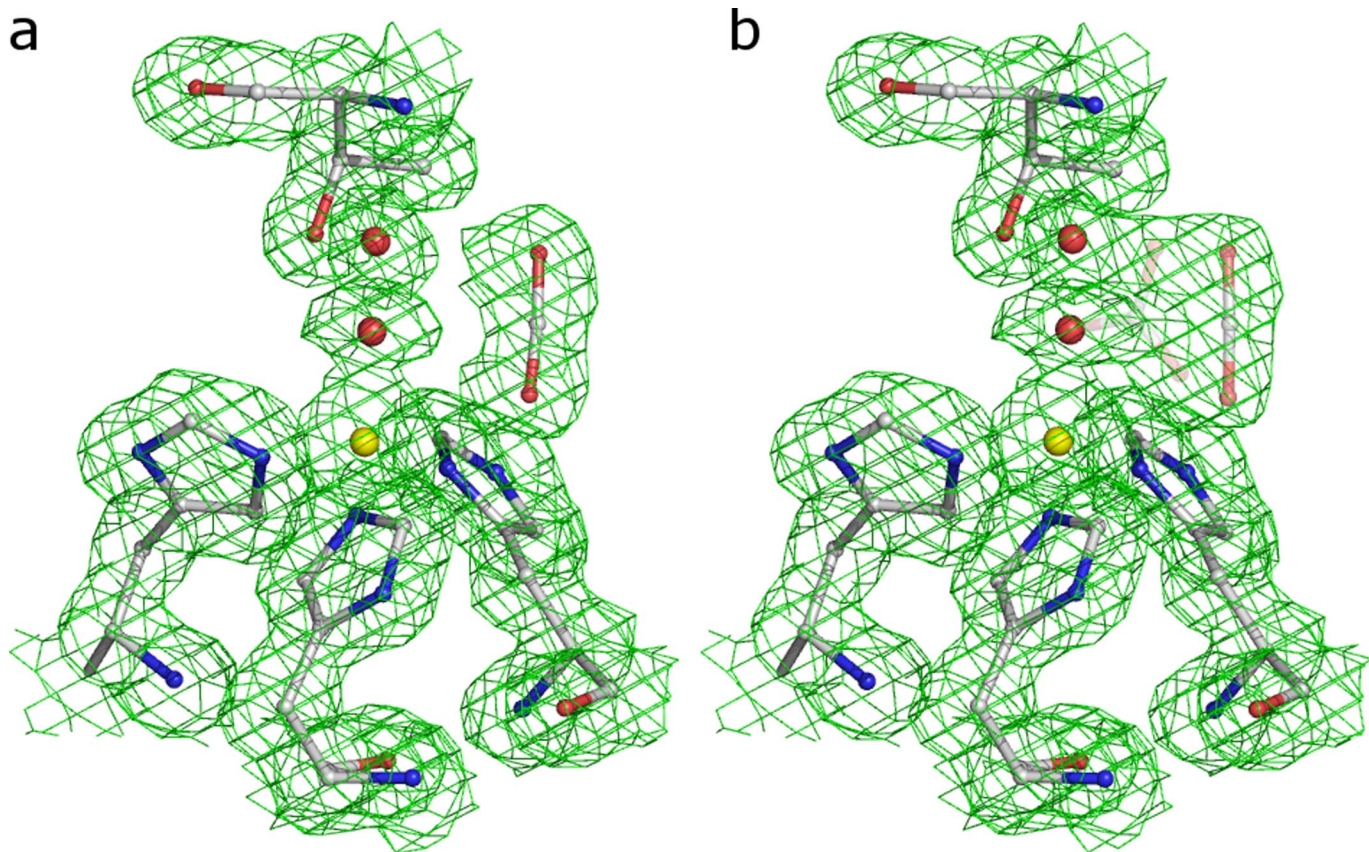

**Movie S2.** Substrate to product conversion in the active site of HCAII using diffraction data collected at 0.94-Å wavelength. Shown above are the first (a) and last (b) images of the movie. The movie presents 11 refined models together with the final  $2|F_o| - |F_c|$  map contoured at  $1\sigma$  level. The movie starts in a state corresponding to the HCAII:CO<sub>2</sub> complex, proceeds through decreasing substrate to product ratios, and ends in a state with 70% CO<sub>2</sub> and 30% HCO<sub>3</sub><sup>-</sup> at delivered dose corresponding to 30% Henderson limit. The occupancy of carbon dioxide and bicarbonate is represented by the transparency of the models.

[Movie S2 \(GIF\)](#)

**Table S1. First movie data collection and refinement statistics**

|                               | First set                                                                                  | Last set                                                                                   |
|-------------------------------|--------------------------------------------------------------------------------------------|--------------------------------------------------------------------------------------------|
| <b>Data collection</b>        |                                                                                            |                                                                                            |
| Beamline                      | X11, EMBL/DESY                                                                             | X11, EMBL/DESY                                                                             |
| Wavelength, Å                 | 1.278                                                                                      | 1.278                                                                                      |
| Flux, photons per second*     | $3.6 \times 10^{10}$                                                                       |                                                                                            |
| Space group                   | $P2_1$                                                                                     | $P2_1$                                                                                     |
| Cell                          | $a = 42.17 \text{ \AA}, b = 41.45 \text{ \AA}, c = 72.36 \text{ \AA}, \beta = 103.9^\circ$ | $a = 42.17 \text{ \AA}, b = 41.45 \text{ \AA}, c = 72.36 \text{ \AA}, \beta = 103.9^\circ$ |
| Unique reflections            | 28,729                                                                                     | 28,824                                                                                     |
| Resolution, Å                 | 19.88–1.66 (1.75–1.66)                                                                     | 19.88–1.66 (1.75–1.66)                                                                     |
| Redundancy                    | 3.7 (3.4)                                                                                  | 3.7 (3.4)                                                                                  |
| Completeness, %               | 99.2 (95.1)                                                                                | 99.3 (95.5)                                                                                |
| $R_{\text{merge}}$            | 0.036 (0.142)                                                                              | 0.035 (0.156)                                                                              |
| <b>Refinement</b>             |                                                                                            |                                                                                            |
| No. of reflections            | 27,250                                                                                     | 27,341                                                                                     |
| $R$ value                     | 0.176                                                                                      | 0.176                                                                                      |
| $R_{\text{free}}$             | 0.222                                                                                      | 0.219                                                                                      |
| rmsd from ideality, bonds, Å  | 0.017                                                                                      | 0.014                                                                                      |
| rmsd from ideality, angles, ° | 1.721                                                                                      | 1.563                                                                                      |
| Overall B, Å <sup>2</sup>     | 17.0                                                                                       | 17.6                                                                                       |

Numbers in parentheses refer to the last resolution shell.  $R_{\text{merge}} = \sum |I_i - \langle I \rangle| / \sum I_i$ , where  $I_i$  is the intensity of an individual reflection and  $\langle I \rangle$  is the mean intensity of that reflection.  $R$  value =  $\sum |F_o - F_c| / \sum F_o$ .  $R_{\text{free}}$  is the cross-validation  $R$  value computed for a subset of reflections, omitted in the refinement process (5% of the total number of reflections).

\*Data were collected in dose mode.

Table S2. Second movie data collection and refinement statistics

|                               | First set                                                                            | Last set                                                                             |
|-------------------------------|--------------------------------------------------------------------------------------|--------------------------------------------------------------------------------------|
| Data collection               |                                                                                      |                                                                                      |
| Beamline                      | ID14-4, ESRF                                                                         | ID14-4, ESRF                                                                         |
| Wavelength, Å                 | 0.94                                                                                 | 0.94                                                                                 |
| Flux, photons per second      | $7.2 \times 10^{11}$                                                                 | $6.9 \times 10^{11}$                                                                 |
| Space group                   | $P2_1$                                                                               | $P2_1$                                                                               |
| Cell                          | $a = 42.20 \text{ Å}, b = 41.49 \text{ Å}, c = 72.39 \text{ Å}, \beta = 104.0^\circ$ | $a = 42.20 \text{ Å}, b = 41.49 \text{ Å}, c = 72.39 \text{ Å}, \beta = 104.0^\circ$ |
| Unique reflections            | 38,406                                                                               | 38,993                                                                               |
| Resolution, Å                 | 41.49–1.50 (1.58–1.50)                                                               | 41.49–1.50 (1.58–1.50)                                                               |
| Redundancy                    | 3.6 (3.6)                                                                            | 3.6 (3.6)                                                                            |
| Completeness, %               | 98.3 (99.2)                                                                          | 98.9 (98.7)                                                                          |
| $R_{\text{merge}}$            | 0.056 (0.127)                                                                        | 0.061 (0.275)                                                                        |
| Refinement                    |                                                                                      |                                                                                      |
| No. of reflections            | 36,425                                                                               | 36,964                                                                               |
| $R$ value                     | 0.193                                                                                | 0.189                                                                                |
| $R_{\text{free}}$             | 0.242                                                                                | 0.233                                                                                |
| rmsd from ideality, bonds, Å  | 0.017                                                                                | 0.017                                                                                |
| rmsd from ideality, angles, ° | 1.731                                                                                | 1.742                                                                                |
| Overall B, Å <sup>2</sup>     | 18.8                                                                                 | 19.7                                                                                 |

Numbers in parentheses refer to the last resolution shell.  $R_{\text{merge}} = \sum |I_i - \langle I \rangle| / \sum I_i$ , where  $I_i$  is the intensity of an individual reflection and  $\langle I \rangle$  is the mean intensity of that reflection.  $R$  value =  $\sum |F_o - F_c| / \sum F_o$ .  $R_{\text{free}}$  is the cross-validation  $R$  value computed for a subset of reflections, omitted in the refinement process (5% of the total number of reflections).
